# Supplementary material for: FVB/N mouse strain regulatory T cells differ in phenotype and function from the C57BL/6 and BALB/C strains
Source: PubMed Central journal article supplement — FASEB Bioadv. 2022 Jun 24;4(10):648–61. doi: 10.1096/fba.2021-00161 (PMC9536134; doi:10.1096/fba.2021-00161), 2022-06-24
Supplement: FBA2-4-648-s001.pdf [file FBA2-4-648-s001.pdf]

SUPPLEMENTARY FIGURES

Supplementary Figure S1

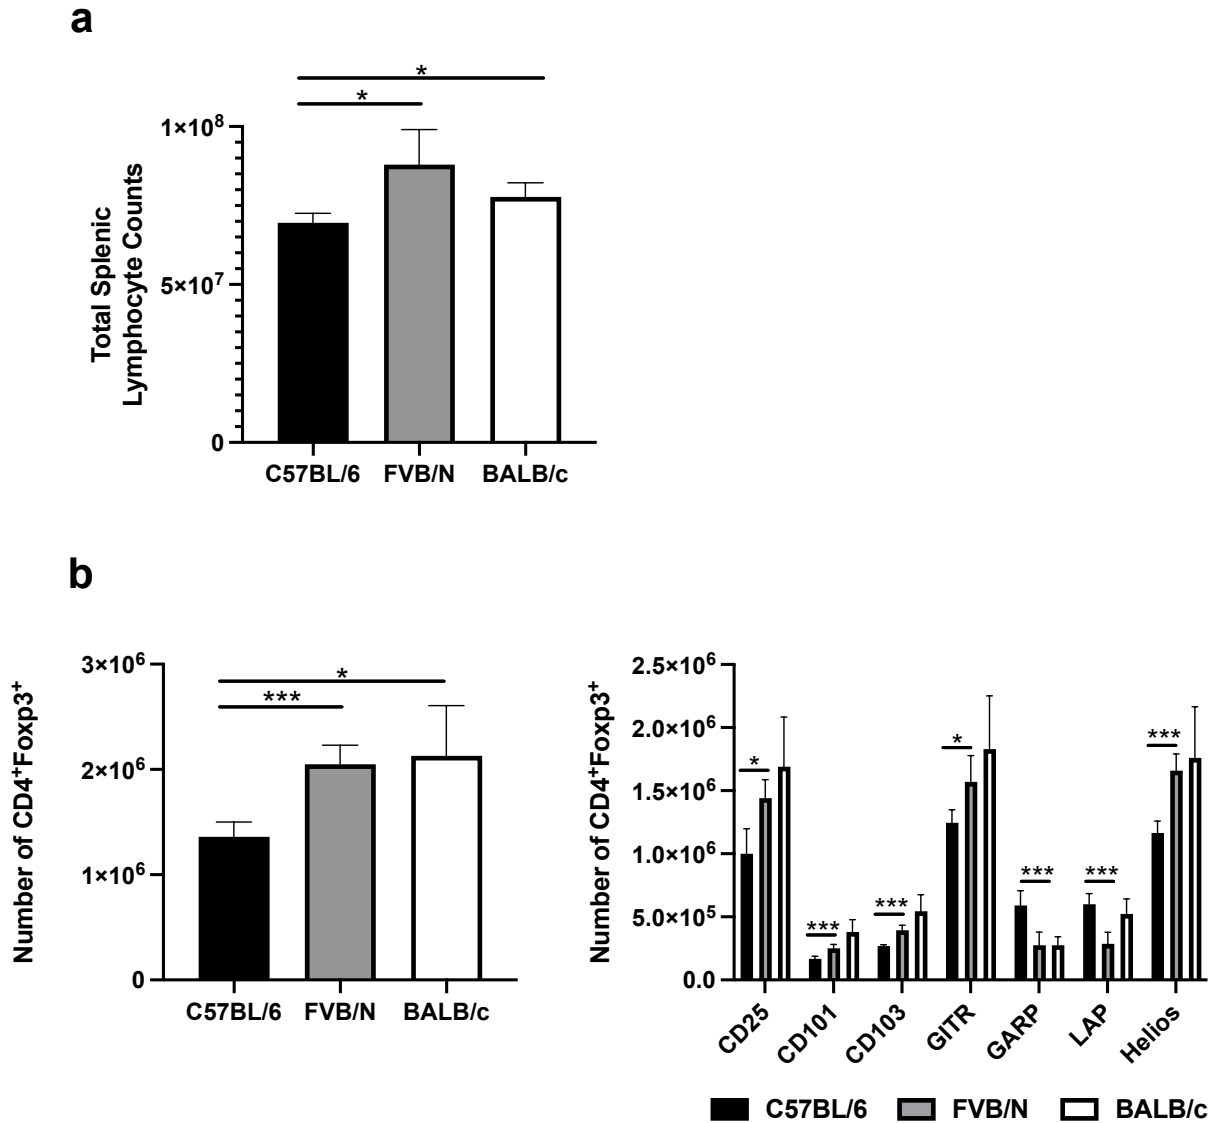

**Supplementary Figure S1:** Cell counts after splenic cell isolation. (a) Total lymphocyte counts immediately after splenic isolation (isolated as described in the Materials and Methods section). (b) Cell counts of CD4<sup>+</sup>Foxp3<sup>+</sup> cells and CD4<sup>+</sup>Foxp3<sup>+</sup> cells expressing various regulatory T cell markers. \*  $P \leq 0.05$ ; \*\*\*  $P \leq 0.001$ . Data is representative of 3 independent experiments, with 4 samples per group. Mean + standard deviation shown.

## Supplementary Figure S2

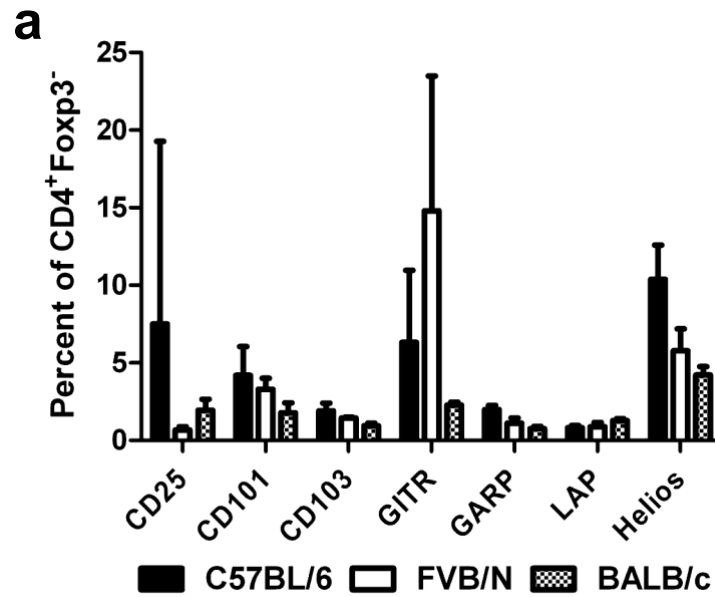

**Supplementary Figure S1** Treg surface markers on C57BL/6, FVB/N, and BALB/c CD4<sup>+</sup>Foxp3<sup>-</sup> Teff cells. (a) Freshly isolated splenocytes were stained and analyzed. Expression was analyzed using flow cytometry. Lymphocytes were gated on based on forward scatter/side scatter and then subsequently gated on CD4<sup>+</sup>Foxp3<sup>-</sup> cells.
